# Supplementary material
Source: publisher figshare collection journal article supplement (https://wiley.figshare.com/articles/dataset/_/3557865)
Supplement: Supplementary file 1 [file 1 › appendix-B.htm]

Ecological Archives E094-230-A2


*Ecological Archives* E094-230-A2

Caroline E. Farrior, David Tilman, Ray Dybzinski, Peter B. Reich, Simon A. Levin, Stephen W. Pacala. 2013. Resource limitation in a competitive context determines complex plant responses to experimental resource additions. *Ecology* 94:2505–2517. http://dx.doi.org/10.1890/12-1548.1

Appendix B. Relaxation of territoriality and well-mixed assumptions.

> View / download PDF.


---

[Back to E094-230]
